# Supplementary material for: Nanocomposite tectons as unifying systems for nanoparticle assembly
Source: Royal Society of Chemistry journal article supplement (doi:10.1039/d1sm01738a), 2022-01-01
Supplement: d1sm01738a1.pdf [file d1sm01738a1.pdf]

# Supporting Information: Nanocomposite Tectons as Unifying Systems for Nanoparticle Assembly

Jianshe Xia,<sup>†,‡</sup> Margaret Lee,<sup>¶</sup> Peter J. Santos,<sup>¶</sup> Nathan Horst,<sup>§,||</sup> Robert J.  
Macfarlane,<sup>¶</sup> Hongxia Guo,<sup>\*,†,‡</sup> and Alex Travesset<sup>\*,⊥</sup>

<sup>†</sup> *Beijing National Laboratory for Molecular Sciences, Institute of Chemistry, Chinese  
Academy of Sciences, Beijing 100190, China*

<sup>‡</sup> *University of Chinese Academy of Sciences, Beijing 100049, China*

<sup>¶</sup> *Department of Materials Science and Engineering, Massachusetts Institute of Technology,  
77 Massachusetts Avenue, Cambridge, Massachusetts 02139, United States*

<sup>§</sup> *Department of Materials Science and Engineering, Iowa State University, Ames, Iowa  
50011, USA*

<sup>||</sup> *Ames Laboratory, U.S. Department of Energy, Ames, Iowa 50011, USA*

<sup>⊥</sup> *Department of Physics and Astronomy and Department of Materials Science and  
Engineering, Iowa State University and Ames Lab, Ames, IA 50011, USA*

E-mail: hxguo@iccas.ac.cn; trvsst@ameslab.gov

# MD Force Field Parameters

Table S1: Pairwise interaction strength of Lennard-Jones (LJ) potentials,  $\epsilon_{ij}$  are summarized, with the hybridization interaction energy defined between CG particles “A” and “B”  $\epsilon_H = \epsilon_{AB}$ .

| $\epsilon_{ij}$ | PS | FL | A            | B            |
|-----------------|----|----|--------------|--------------|
| PS              | 1  | 1  | 1            | 1            |
| FL              | 1  | 1  | 1            | 1            |
| A               | 1  | 1  | 1            | $\epsilon_H$ |
| B               | 1  | 1  | $\epsilon_H$ | 1            |

Table S2: Effective LJ diameter of beads in the system,  $\sigma_{ij}$  are calculated by additive arithmetic rules, and summarized below.

| $\sigma_{ij}$ | PS   | FL   | A    | B    |
|---------------|------|------|------|------|
| PS            | 1    | 0.75 | 0.75 | 0.75 |
| FL            | 0.75 | 0.5  | 0.5  | 0.5  |
| A             | 0.75 | 0.5  | 0.5  | 0.5  |
| B             | 0.75 | 0.5  | 0.5  | 0.5  |

Table S3: Cutoff of the non-bonded potential, with most pairwise interactions truncated at the LJ energy minimum ( $2^{1/6}\sigma_{ij}$ ) and extended range interactions for PS-PS and A-B interactions.

| $r_{cut}(\sigma_{ij})$ | PS        | FL        | A         | B         |
|------------------------|-----------|-----------|-----------|-----------|
| PS                     | 2.5       | $2^{1/6}$ | $2^{1/6}$ | $2^{1/6}$ |
| FL                     | $2^{1/6}$ | $2^{1/6}$ | $2^{1/6}$ | $2^{1/6}$ |
| A                      | $2^{1/6}$ | $2^{1/6}$ | $2^{1/6}$ | 2.5       |
| B                      | $2^{1/6}$ | $2^{1/6}$ | 2.5       | $2^{1/6}$ |

Table S4: Harmonic bond potentials between CG beads in our system.

|                                | PS-PS | PS-NCT | PS-Core |
|--------------------------------|-------|--------|---------|
| $r_0(\sigma)$                  | 0.84  | 0.63   | 0.84    |
| $k(\frac{\epsilon}{\sigma^2})$ | 330   | 330    | 330     |

Table S5: Harmonic angle potentials between CG beads in our system.

|               | PS-PS-PS   | PS-PS-NCT  | PS-PS-Core |
|---------------|------------|------------|------------|
| $\theta_0$    | 180        | 180        | 180        |
| $k(\epsilon)$ | $k_\theta$ | $k_\theta$ | $k_\theta$ |

## Solvent Quality

We set up our model to mimic NCTs in “good solvent” conditions. The solvent quality is parameterized through the coarse-grained temperature of the system. The different regimes (good,  $\theta$  and poor solvent) are determined through the analysis of the polymer radius of gyration  $R_g$  for varying polymer length  $n$  – where constant  $\log(\frac{\langle R_g^2 \rangle}{n}) \approx -1.38$  for increasing  $\log(n)$  corresponds to the theta temperature ( $T_\theta$ ) of the system. Then, with  $r_0 = 0.84$  (from the coefficient of the harmonic bond) it is

$$\langle R_g^2 \rangle \approx \frac{C_\infty n r_0^2 \sigma^2}{6} \rightarrow C_\infty \approx 2.14 \quad (\text{S1})$$

and from

$$\left. \begin{aligned} n r_0 \sigma &= N b \\ C_\infty n r_0^2 \sigma^2 &= N b^2 \end{aligned} \right\} \rightarrow b = 1.79 \sigma \quad , \quad N = 0.47 n . \quad (\text{S2})$$

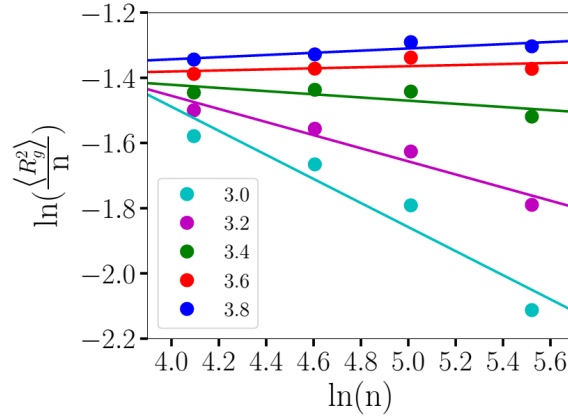

Figure S1: The variation of  $\log(\frac{\langle R_g^2 \rangle}{n})$  with  $\ln(n)$ , where the theta temperature  $T_\theta = 3.5$ .

The analysis of  $T_\theta$  is shown in Fig. S1. The good solvent condition requires  $T > 3.5$ . Therefore, the temperature used in our simulations is  $T = 4.0$ . These conditions are reflected in the calculated potential of mean force, where in the absence of hydrogen bonding the potential is repulsive.

## Dependence of hybridizations on core size

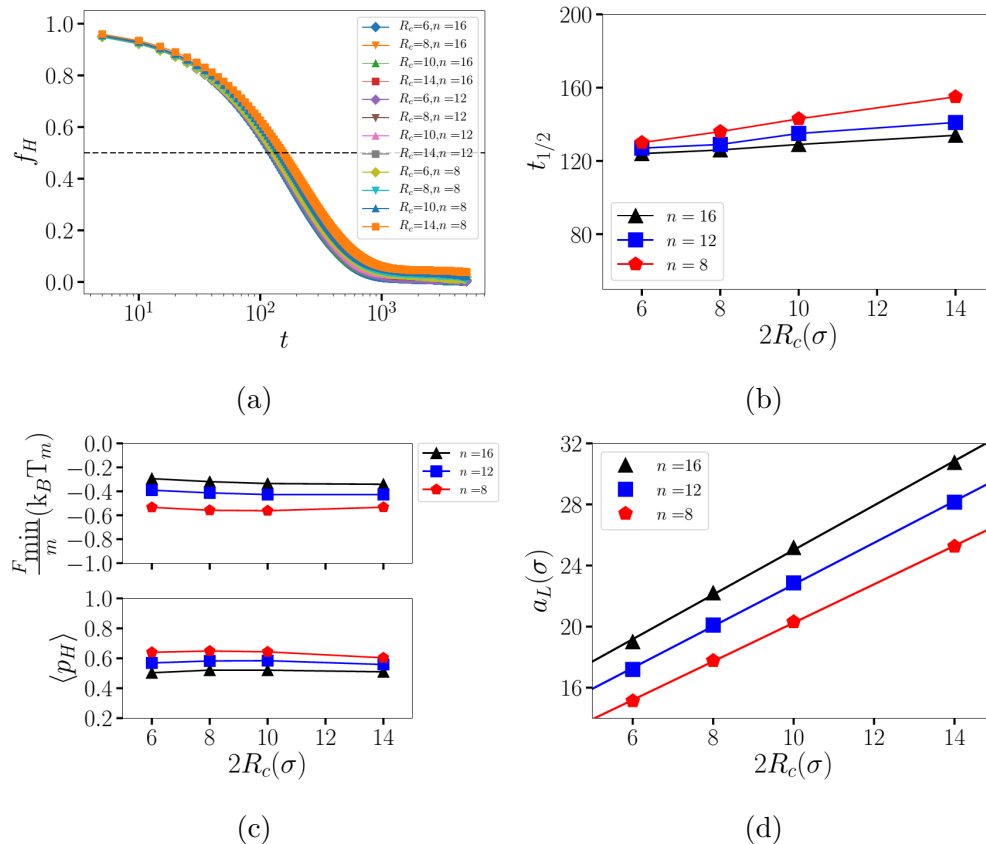

Figure S2: (a) The fraction of hybridizations  $f_H$  that lives up to a time  $t$  as a function of the core diameter  $2R_c$ ; (b) The mean lifetime of a hybridization, (c) the minimum of the free energy per  $F_{\min}/m$  and (d) the corresponding lattice constant  $a_L$  vary with  $2R_c$ , where  $a_L$  changes linearly with  $2R_c$ . All plots correspond to the CsCl lattices at  $\frac{\epsilon_{AB}}{k_B T_m} = 13.0$  with the core diameter  $2R_c = 6, 8, 10, 14\sigma$ , see Table 2.

## Calculation of Free Energies

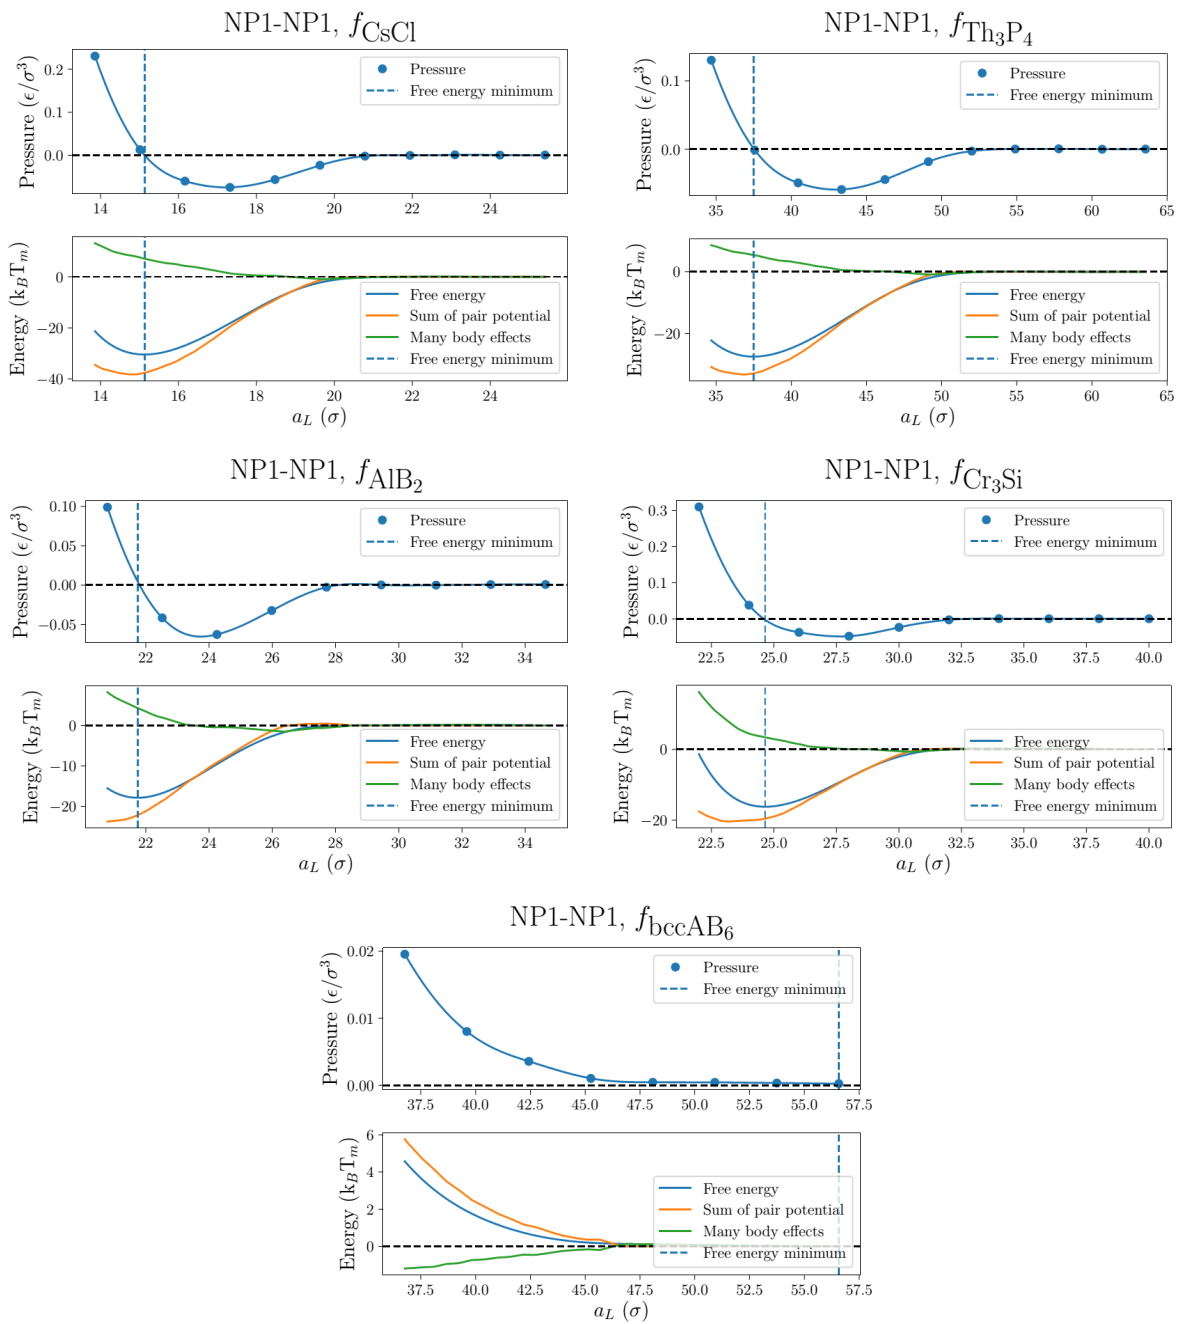

Figure S3: Pressure and free energy vs lattice constant for the BNSL CsCl, Th<sub>3</sub>P<sub>4</sub>, AlB<sub>2</sub>, Cr<sub>3</sub>Si and bccAB<sub>6</sub> with NP1 normalized to the number of NPs within the unit cell.

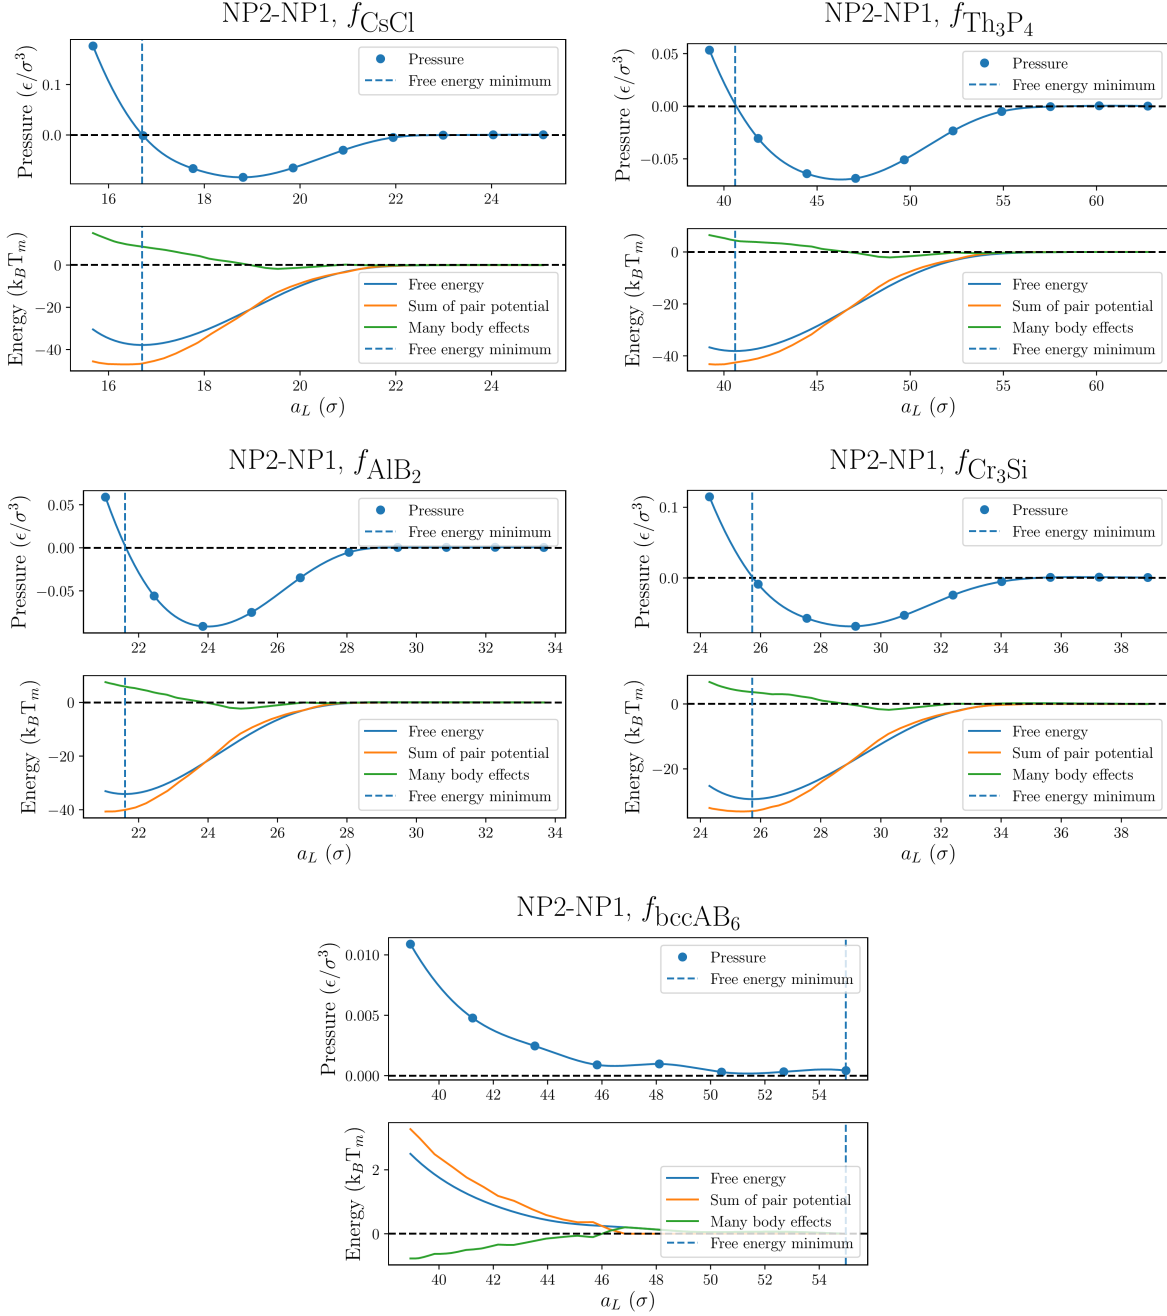

Figure S4: Pressure and free energy vs lattice constant for the BNSL  $\text{CsCl}$ ,  $\text{Th}_3\text{P}_4$ ,  $\text{AlB}_2$ ,  $\text{Cr}_3\text{Si}$  and  $\text{bccAB}_6$  with NP1 and NP2 normalized to the number of NPs within the unit cell.

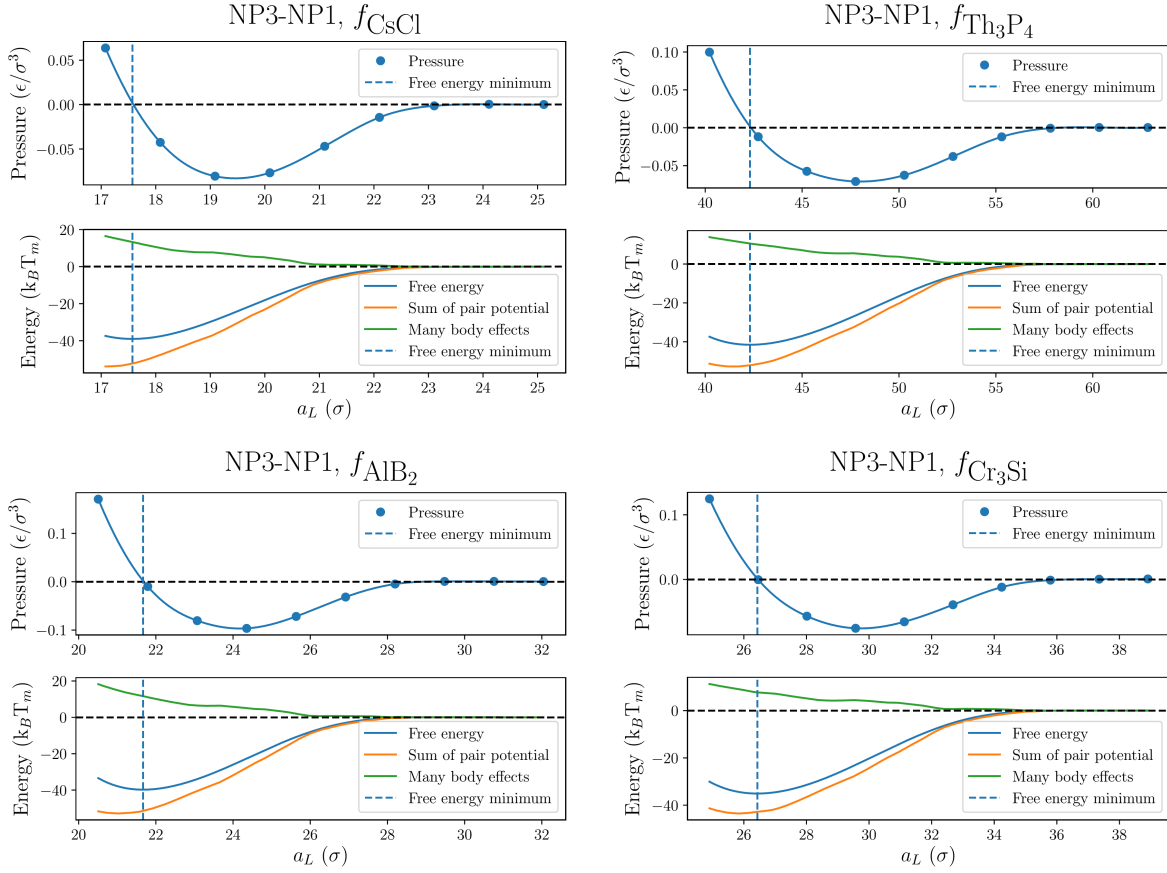

Figure S5: Pressure and free energy vs lattice constant for the BNSL CsCl, Th<sub>3</sub>P<sub>4</sub>, AlB<sub>2</sub>, and Cr<sub>3</sub>Si with NP1 and NP3 normalized to the number of NPs within the unit cell.

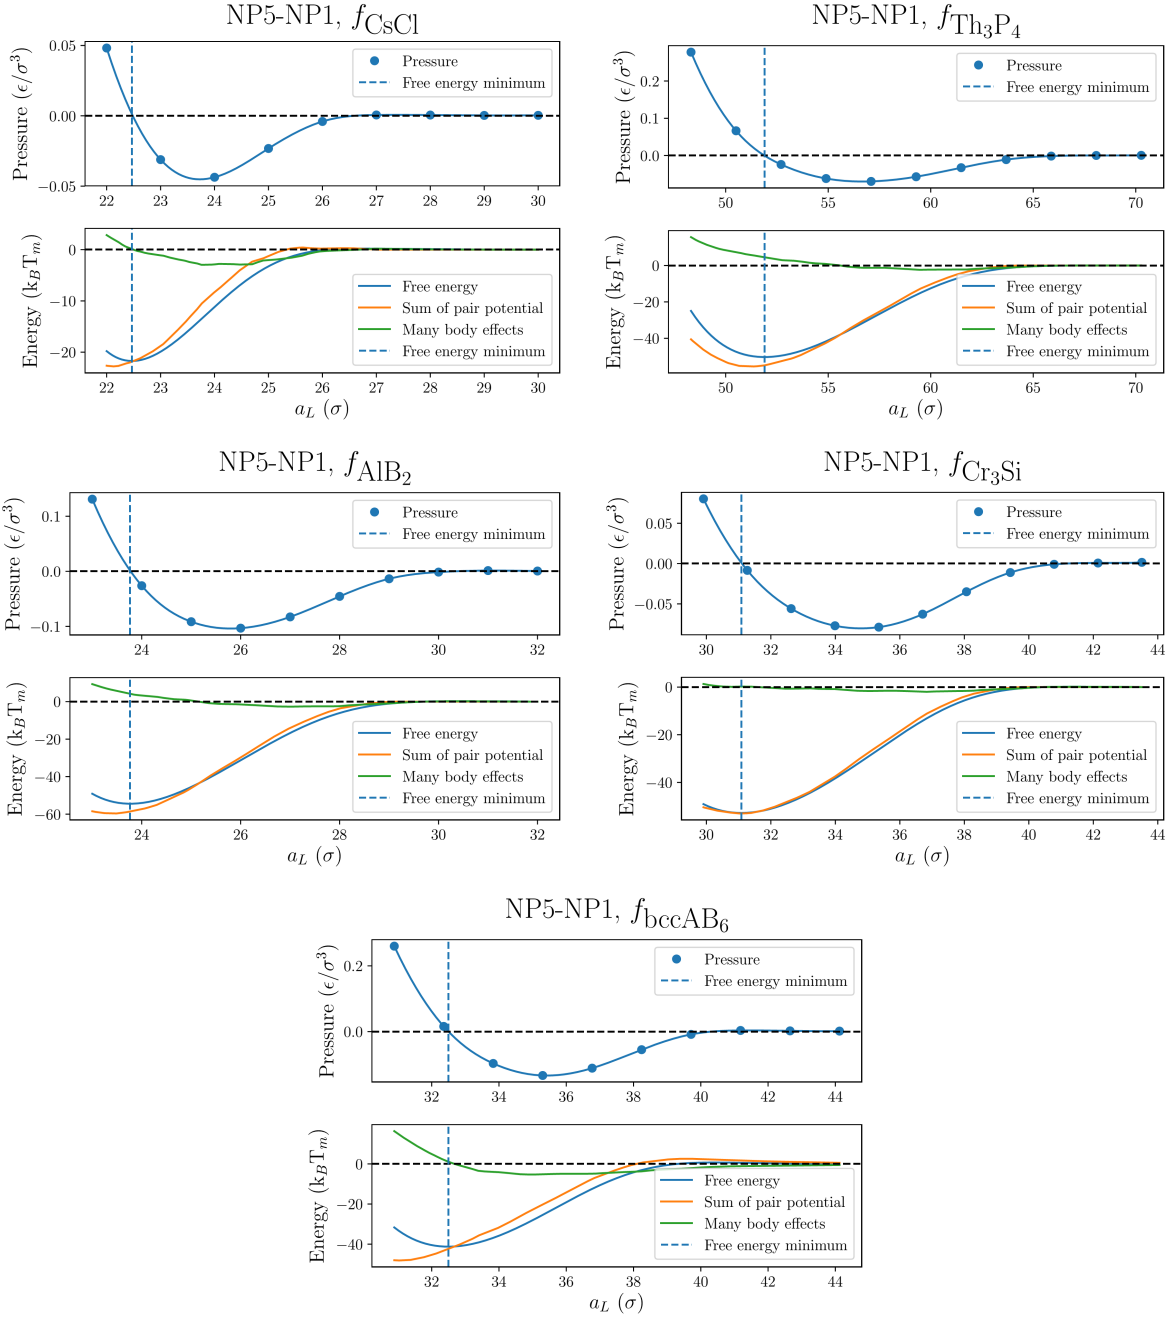

Figure S6: Pressure and free energy vs lattice constant for the BNSL  $\text{CsCl}$ ,  $\text{Th}_3\text{P}_4$ ,  $\text{AlB}_2$ ,  $\text{Cr}_3\text{Si}$  and  $\text{bccAB}_6$  with NP1 and NP5 normalized to the number of NPs within the unit cell.



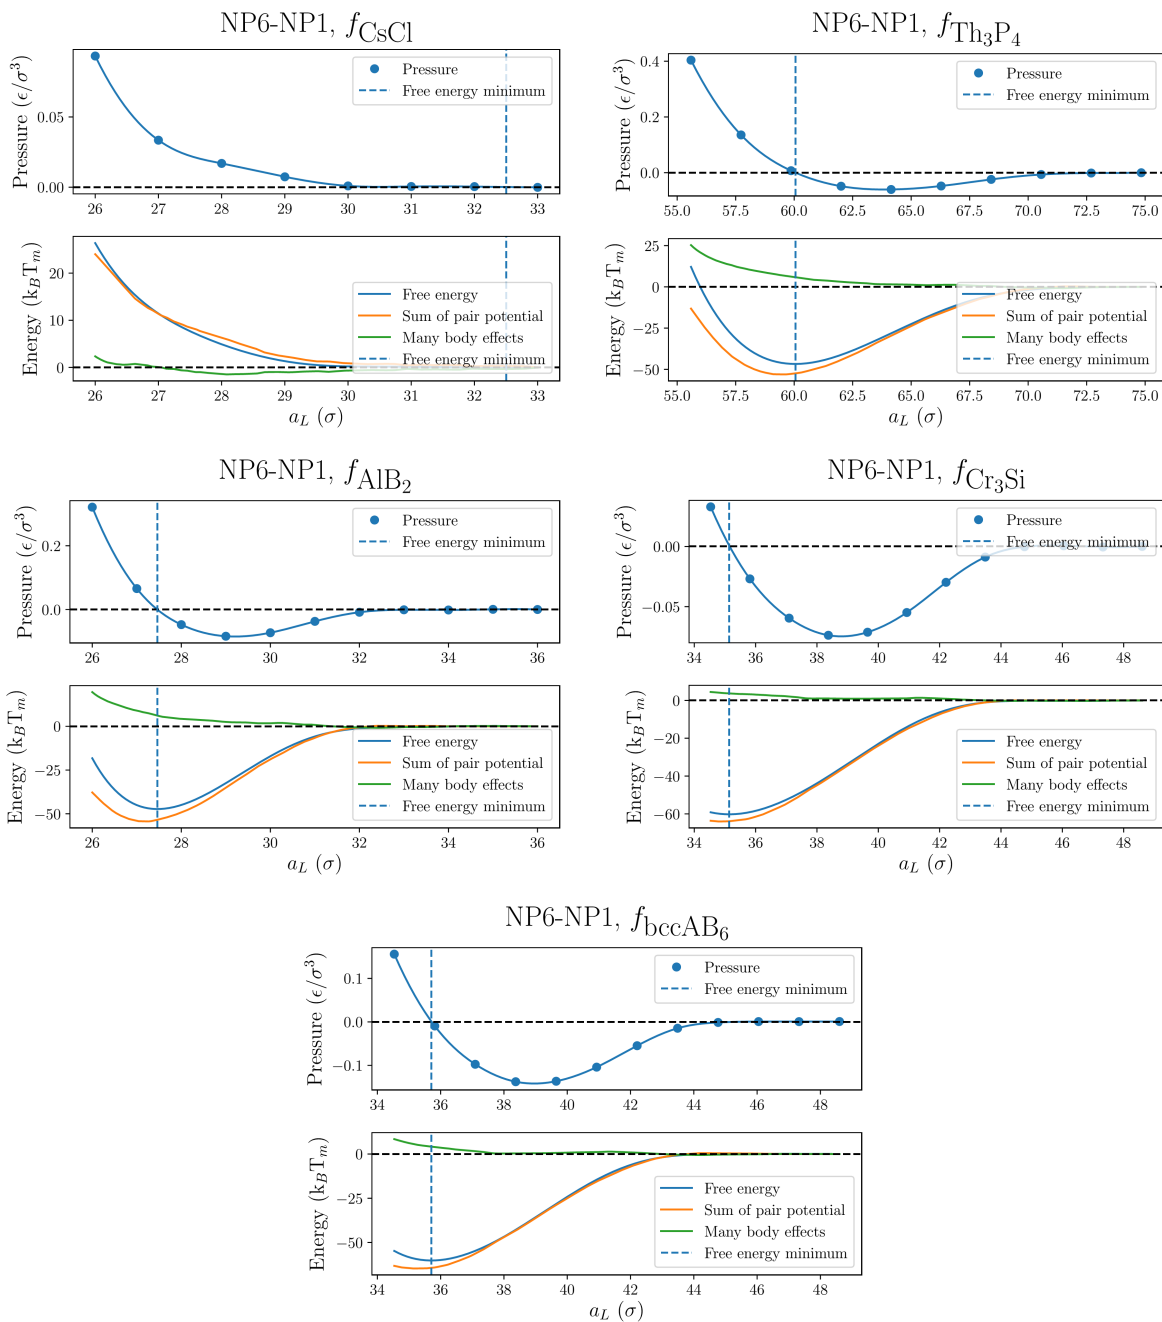

Figure S7: Pressure and free energy vs lattice constant for the BNSL CsCl, Th<sub>3</sub>P<sub>4</sub>, AlB<sub>2</sub>, Cr<sub>3</sub>Si and bccAB<sub>6</sub> with NP1 and NP6 normalized to the number of NPs within the unit cell.

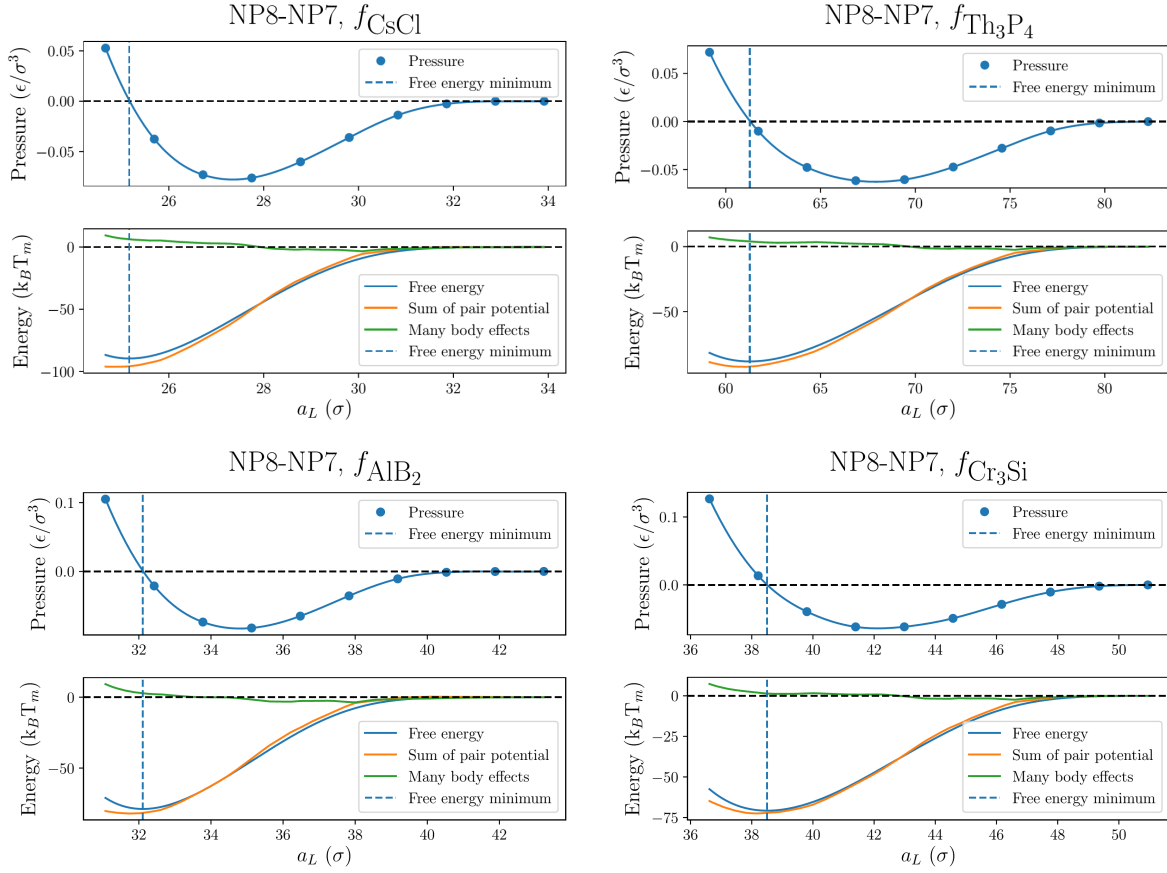

Figure S8: Pressure and free energy vs lattice constant for the BNSL CsCl, Th<sub>3</sub>P<sub>4</sub>, AlB<sub>2</sub>, and Cr<sub>3</sub>Si with NP7 and NP8 normalized to the number of NPs within the unit cell.

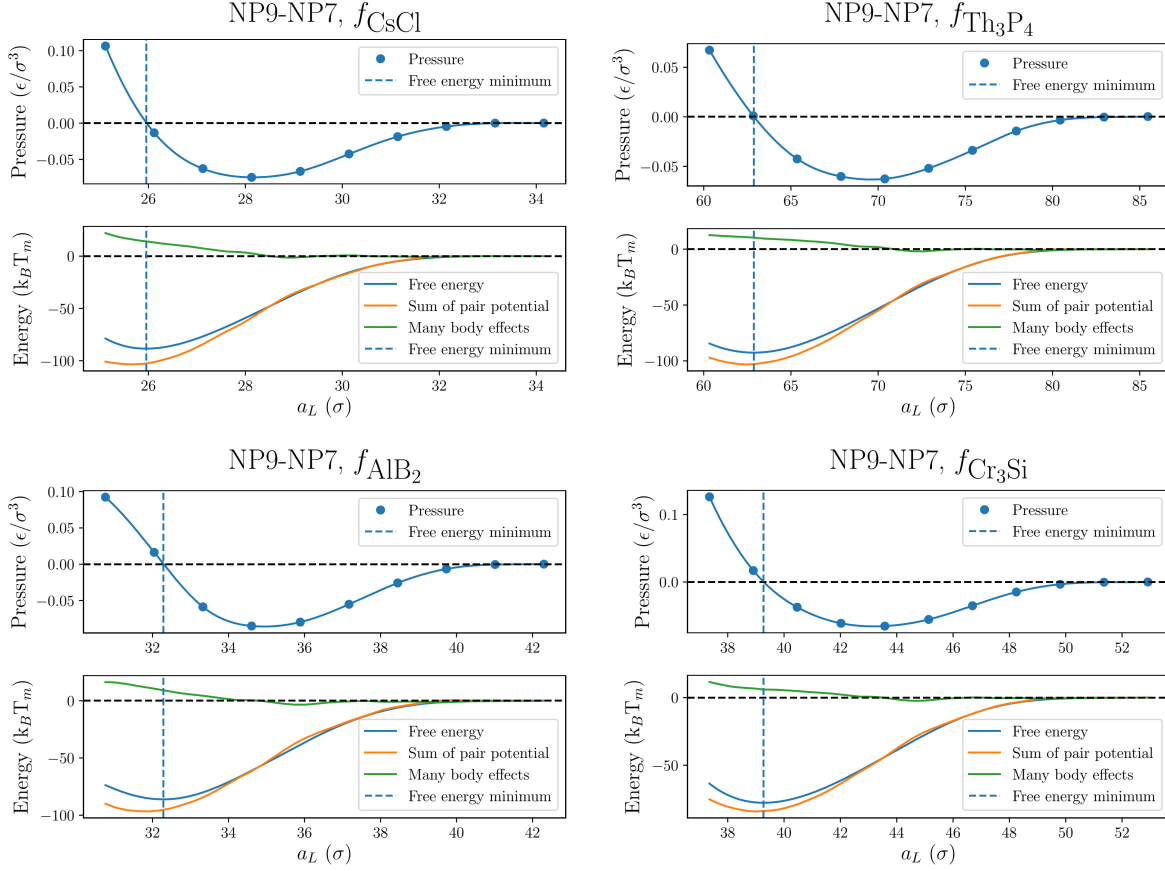

Figure S9: Pressure and free energy vs lattice constant for the BNSL CsCl, Th<sub>3</sub>P<sub>4</sub>, AlB<sub>2</sub>, and Cr<sub>3</sub>Si with NP7 and NP9 normalized to the number of NPs within the unit cell.

## Tables Characterizing BNSL at the Free Energy Minimum

Table S6: Contributions of internal energy,  $-T_m\Delta S$ , free energy and the repulsive part, the average percent of hybridizations and lattice constants at the free energy minimum.

| NP1-NP1 ( $\gamma = 1.0$ )     | $\frac{U}{k_B T_m}$ | $\frac{-\Delta S}{k_B}$ | $\frac{F}{k_B T_m}$ | $f_r$ (%) | $\langle p_H \rangle$ | $a_L(\sigma)$ | OPM   | OTM   |
|--------------------------------|---------------------|-------------------------|---------------------|-----------|-----------------------|---------------|-------|-------|
| CsCl                           | -223.6              | 193.18                  | -36.35              | 4.33      | 0.640                 | 15.13         | 11.58 | 11.58 |
| Th <sub>3</sub> P <sub>4</sub> | -210.6              | 183.11                  | -32.23              | 3.90      | 0.531                 | 37.48         | 28.98 | 28.98 |
| AlB <sub>2</sub>               | -171.4              | 153.55                  | -21.63              | 22.74     | 0.358                 | 21.75         | 17.37 | 17.37 |
| Cr <sub>3</sub> Si             | -137.0              | 120.74                  | -18.68              | 18.70     | 0.261                 | 24.65         | 20.06 | 20.06 |
| bccAB <sub>6</sub>             | 0                   | 0                       | 0                   | 100       | 0                     |               |       |       |

Table S7: Contributions of internal energy,  $-T_m\Delta S$ , free energy and the repulsive part, the average percent of hybridizations and lattice constants at the free energy minimum.

| NP2-NP1 ( $\gamma = 0.81$ )    | $\frac{U}{k_B T_m}$ | $\frac{-\Delta S}{k_B}$ | $\frac{F}{k_B T_m}$ | $f_r$ (%) | $\langle p_H \rangle$ | $a_L(\sigma)$ | OPM   | OTM   |
|--------------------------------|---------------------|-------------------------|---------------------|-----------|-----------------------|---------------|-------|-------|
| CsCl                           | -270.8              | 232.93                  | -37.84              | 4.50      | 0.772                 | 16.70         | 12.97 | 12.97 |
| Th <sub>3</sub> P <sub>4</sub> | -283.1              | 244.95                  | -38.14              | 2.01      | 0.712                 | 40.61         | 32.45 | 32.45 |
| AlB <sub>2</sub>               | -270.6              | 236.48                  | -34.13              | 12.57     | 0.654                 | 21.61         | 17.45 | 17.45 |
| Cr <sub>3</sub> Si             | -227.9              | 198.60                  | -31.75              | 8.93      | 0.736                 | 25.72         | 22.46 | 22.46 |
| bccAB <sub>6</sub>             | 0                   | 0                       | 0                   | 100       | 0                     |               |       |       |

Table S8: Contributions of internal energy,  $-T_m\Delta S$ , free energy and the repulsive part, the average percent of hybridizations and lattice constants at the free energy minimum.

| NP8-NP7 ( $\gamma = 0.78$ )    | $\frac{U}{k_B T_m}$ | $\frac{-\Delta S}{k_B}$ | $\frac{F}{k_B T_m}$ | $f_r$ (%) | $\langle p_H \rangle$ | $a_L(\sigma)$ | OPM   | OTM   |
|--------------------------------|---------------------|-------------------------|---------------------|-----------|-----------------------|---------------|-------|-------|
| CsCl                           | -691.8              | 602.15                  | -89.62              | 6.57      | 0.713                 | 25.17         | 20.77 | 20.77 |
| Th <sub>3</sub> P <sub>4</sub> | -723.3              | 634.97                  | -88.33              | 0.51      | 0.652                 | 61.27         | 51.98 | 51.98 |
| AlB <sub>2</sub>               | -690.5              | 611.57                  | -78.88              | 15.62     | 0.541                 | 32.11         | 27.32 | 27.32 |
| Cr <sub>3</sub> Si             | -600.3              | 529.51                  | -70.79              | 8.46      | 0.631                 | 38.50         | 32.18 | 32.18 |
| bccAB <sub>6</sub>             | 0                   | 0                       | 0                   | 100       | 0                     |               |       |       |

Table S9: Contributions of internal energy,  $-T_m\Delta S$ , free energy and the repulsive part, the average percent of hybridizations and lattice constants at the free energy minimum.

| NP9-NP7 ( $\gamma = 0.74$ )    | $\frac{U}{k_B T_m}$ | $\frac{-\Delta S}{k_B}$ | $\frac{F}{k_B T_m}$ | $f_r$ (%) | $\langle p_H \rangle$ | $a_L(\sigma)$ | OPM   | OTM   |
|--------------------------------|---------------------|-------------------------|---------------------|-----------|-----------------------|---------------|-------|-------|
| CsCl                           | -699.3              | 610.87                  | -88.45              | 8.07      | 0.723                 | 25.96         | 21.39 | 21.39 |
| Th <sub>3</sub> P <sub>4</sub> | -749.9              | 657.3                   | -92.60              | 0.25      | 0.678                 | 62.87         | 53.52 | 53.52 |
| AlB <sub>2</sub>               | -735.9              | 649.70                  | -86.16              | 13.04     | 0.566                 | 32.28         | 27.32 | 27.32 |
| Cr <sub>3</sub> Si             | -649.6              | 571.85                  | -77.70              | 5.78      | 0.596                 | 39.27         | 33.14 | 33.14 |
| bccAB <sub>6</sub>             | 0                   | 0                       | 0                   | 100       | 0                     |               |       |       |

Table S10: Contributions of internal energy,  $-T_m\Delta S$ , free energy and the repulsive part, the average percent of hybridizations and lattice constants at the free energy minimum.

| NP3-NP1 ( $\gamma = 0.74$ )    | $\frac{U}{k_B T_m}$ | $\frac{-\Delta S}{k_B}$ | $\frac{F}{k_B T_m}$ | $f_r$ (%) | $\langle p_H \rangle$ | $a_L(\sigma)$ | OPM   | OTM   |
|--------------------------------|---------------------|-------------------------|---------------------|-----------|-----------------------|---------------|-------|-------|
| CsCl                           | -277.3              | 238.05                  | -39.24              | 7.56      | 0.796                 | 17.57         | 13.64 | 13.64 |
| Th <sub>3</sub> P <sub>4</sub> | -300.8              | 259.4                   | -41.41              | 1.88      | 0.757                 | 42.37         | 34.14 | 34.14 |
| AlB <sub>2</sub>               | -308.1              | 268.32                  | -39.79              | 10.60     | 0.659                 | 21.67         | 16.96 | 16.96 |
| Cr <sub>3</sub> Si             | -268.6              | 233.47                  | -35.09              | 7.88      | 0.691                 | 26.43         | 21.14 | 19.05 |
| bccAB <sub>6</sub>             | 0                   | 0                       | 0                   | 100       | 0                     |               |       |       |

Table S11: Contributions of internal energy,  $-T_m\Delta S$ , free energy and the repulsive part, the average percent of hybridizations and lattice constants at the free energy minimum.

| NP4-NP1 ( $\gamma = 0.68$ )    | $\frac{U}{k_B T_m}$ | $\frac{-\Delta S}{k_B}$ | $\frac{F}{k_B T_m}$ | $f_r$ (%) | $\langle p_H \rangle$ | $a_L(\sigma)$ | OPM   | OTM   |
|--------------------------------|---------------------|-------------------------|---------------------|-----------|-----------------------|---------------|-------|-------|
| CsCl                           | -278.5              | 238.99                  | -39.46              | 12.26     | 0.801                 | 18.51         | 14.74 | 14.74 |
| Th <sub>3</sub> P <sub>4</sub> | -312.7              | 268.22                  | -44.46              | 3.86      | 0.790                 | 44.22         | 35.78 | 35.78 |
| AlB <sub>2</sub>               | -334.7              | 290.20                  | -44.54              | 10.41     | 0.718                 | 21.81         | 17.36 | 17.36 |
| Cr <sub>3</sub> Si             | -305.4              | 265.25                  | -40.12              | 3.82      | 0.637                 | 27.24         | 22.15 | 20.05 |
| bccAB <sub>6</sub>             | -0.1                | 0.06                    | -0.04               | 100       | 0                     |               |       |       |

Table S12: Contributions of internal energy,  $-T_m\Delta S$ , free energy and the repulsive part, the average percent of hybridizations and lattice constants at the free energy minimum.

| NP5-NP1 ( $\gamma = 0.52$ )    | $\frac{U}{k_B T_m}$ | $\frac{-\Delta S}{k_B}$ | $\frac{F}{k_B T_m}$ | $f_r$ (%) | $\langle p_H \rangle$ | $a_L(\sigma)$ | OPM   | OTM   |
|--------------------------------|---------------------|-------------------------|---------------------|-----------|-----------------------|---------------|-------|-------|
| CsCl                           | -241.9              | 220.13                  | -21.72              | 30.82     | 0.701                 | 22.47         | 19.19 | 19.19 |
| Th <sub>3</sub> P <sub>4</sub> | -327.1              | 276.79                  | -50.28              | 4.42      | 0.831                 | 51.90         | 42.21 | 42.21 |
| AlB <sub>2</sub>               | -364.5              | 310.01                  | -54.45              | 8.49      | 0.788                 | 23.77         | 19.19 | 19.19 |
| Cr <sub>3</sub> Si             | -381.8              | 329.01                  | -52.83              | 0.51      | 0.729                 | 31.09         | 26.14 | 22.18 |
| bccAB <sub>6</sub>             | -354.6              | 313.39                  | -39.49              | 18.90     | 0.649                 | 32.50         | 28.37 | 25.23 |

Table S13: Contributions of internal energy,  $-T_m\Delta S$ , free energy and the repulsive part, the average percent of hybridizations and lattice constants at the free energy minimum.

| NP6-NP1 ( $\gamma = 0.43$ )    | $\frac{U}{k_B T_m}$ | $\frac{-\Delta S}{k_B}$ | $\frac{F}{k_B T_m}$ | $f_r$ (%) | $\langle p_H \rangle$ | $a_L(\sigma)$ | OPM   | OTM   |
|--------------------------------|---------------------|-------------------------|---------------------|-----------|-----------------------|---------------|-------|-------|
| CsCl                           | 0                   | 0                       | 0                   | 100       | 0                     | 32.50         | 23.50 | 23.50 |
| Th <sub>3</sub> P <sub>4</sub> | -310.9              | 264.13                  | -46.72              | 12.19     | 0.800                 | 60.05         | 50.25 | 50.25 |
| AlB <sub>2</sub>               | -346.1              | 298.83                  | -47.28              | 16.33     | 0.758                 | 27.47         | 23.50 | 23.50 |
| Cr <sub>3</sub> Si             | -407.1              | 346.90                  | -60.24              | 0.76      | 0.784                 | 35.12         | 29.99 | 27.09 |
| bccAB <sub>6</sub>             | -431.5              | 371.31                  | -60.17              | 9.67      | 0.722                 | 35.71         | 29.99 | 28.53 |

## Effects of Rigidity

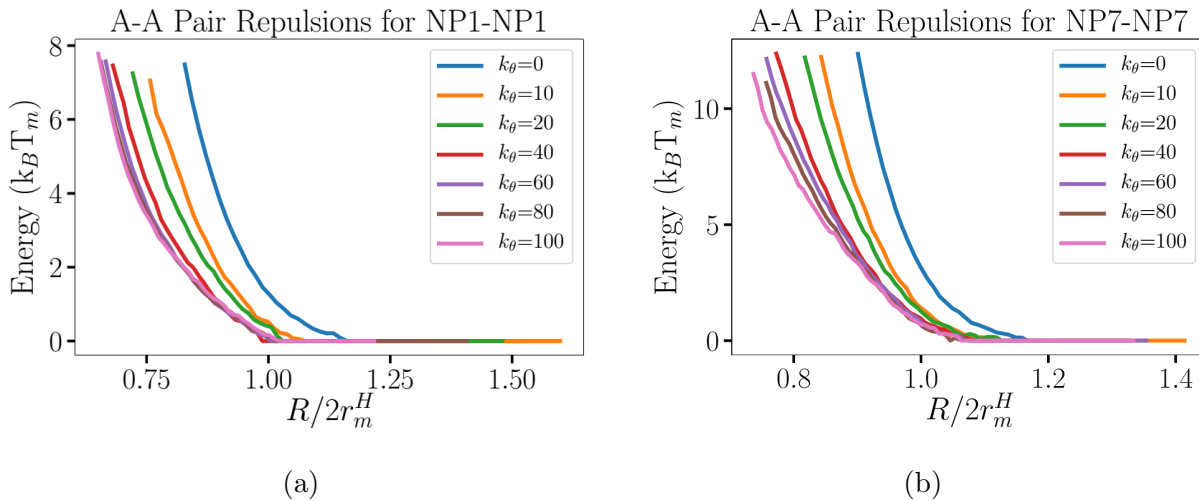

Figure S10: Pair repulsions as a function of the spring parameter  $k_\theta$  of the harmonic angle potential for (a) NP1 - NP1 and (b) NP7 - NP7.

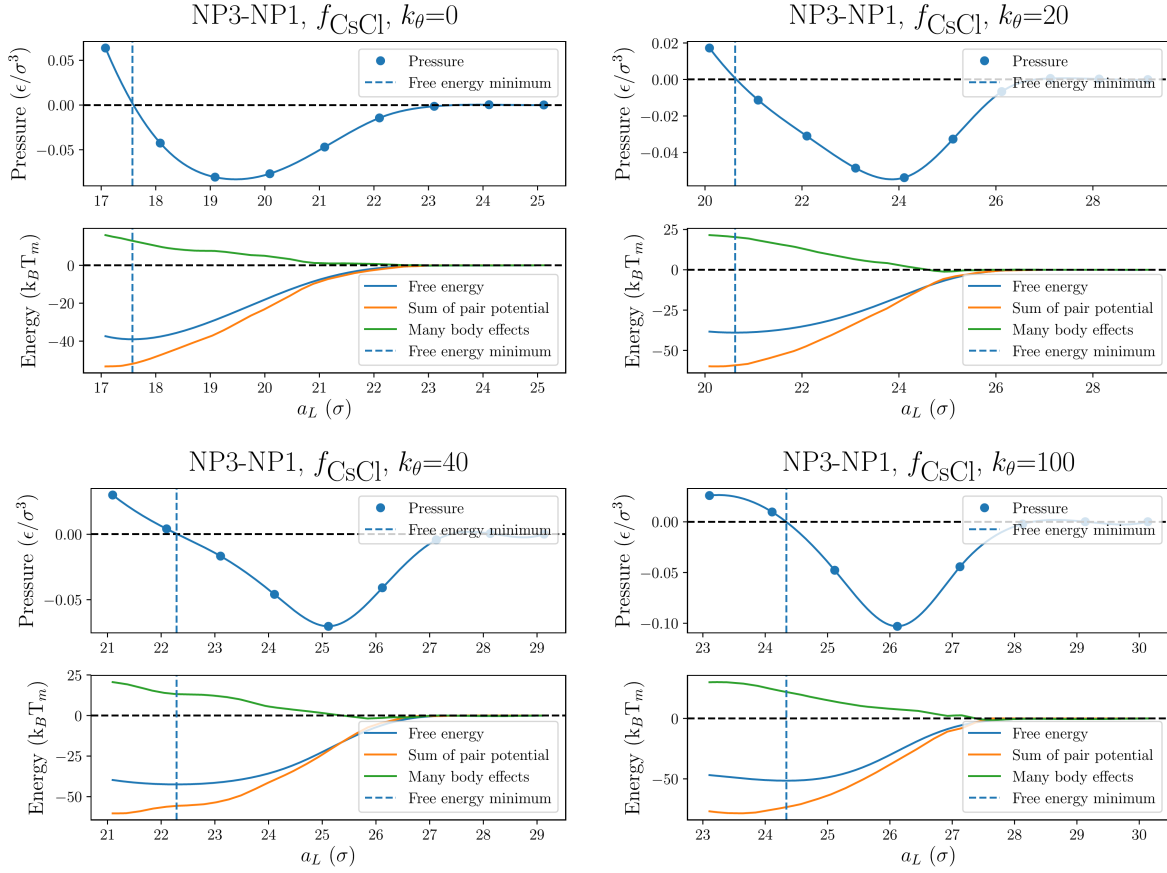

Figure S11: Pressure and free energy vs lattice constant for the BNSL CsCl with NP1 and NP3 under the different values of the spring parameter  $k_\theta$  of the harmonic angle potential normalized to the number of NPs within the unit cell.

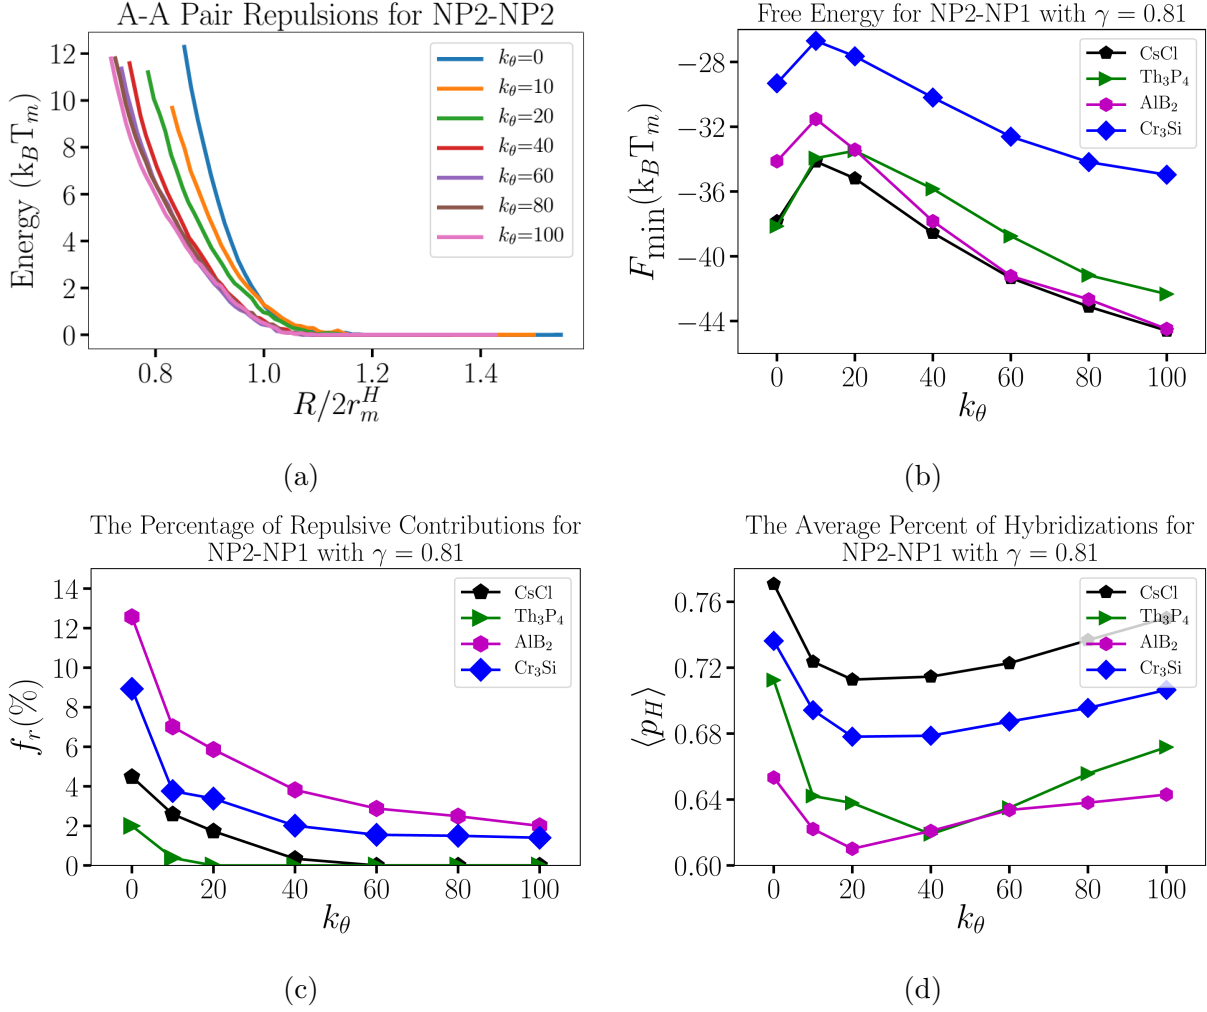

Figure S12: The effect of the spring parameter  $k_\theta$  of the harmonic angle potential on (a) potential of mean force (NP2-NP2), (b) free energies, (c) the repulsive fraction  $f_r$  (see Eq. 17) and (d) the average percent of hybridizations  $\langle p_H \rangle$  for CsCl,  $\text{Th}_3\text{P}_4$ ,  $\text{AlB}_2$  and  $\text{Cr}_3\text{Si}$  with  $\gamma = 0.74$  (NP2 - NP1), see Table 2 for detailed values. All values are for  $\frac{\epsilon_{AB}}{k_B T_m} = 13.0$ .



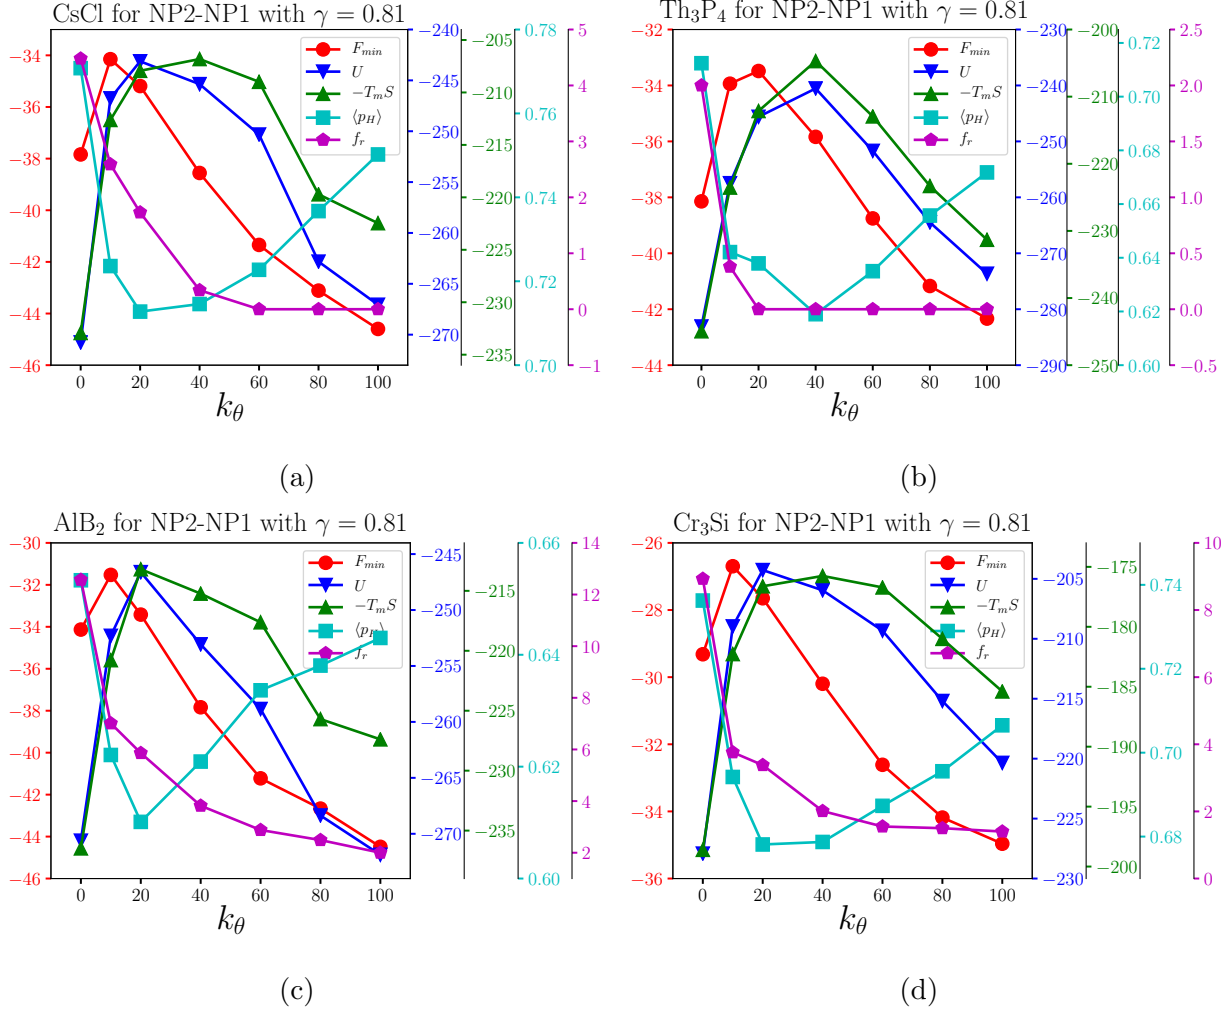

Figure S13: The variations of free energies, internal energies, entropy, the average percent of hybridizations  $\langle p_H \rangle$  and the repulsive fraction  $f_r$  with the spring parameter  $k_\theta$  of the harmonic angle potential for (a) CsCl, (b) Th<sub>3</sub>P<sub>4</sub>, (c) AlB<sub>2</sub> and (d) Cr<sub>3</sub>Si with  $\gamma = 0.81$  (NP2 - NP1), see Table 2 for detailed values. All values are for  $\frac{\varepsilon_{AB}}{k_B T_m} = 13.0$ . The units for the free energies, internal energies and  $-T_m S$  are all  $k_B T_m$ .

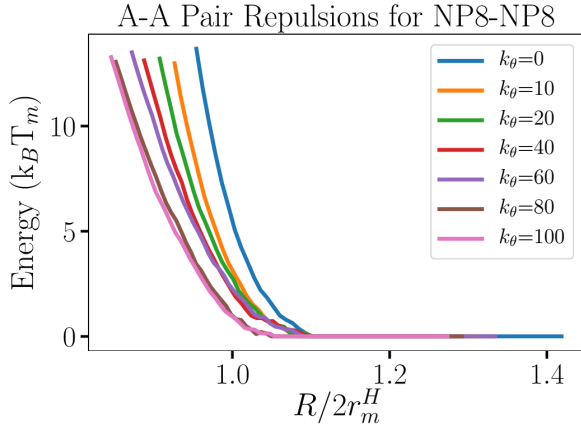

(a)

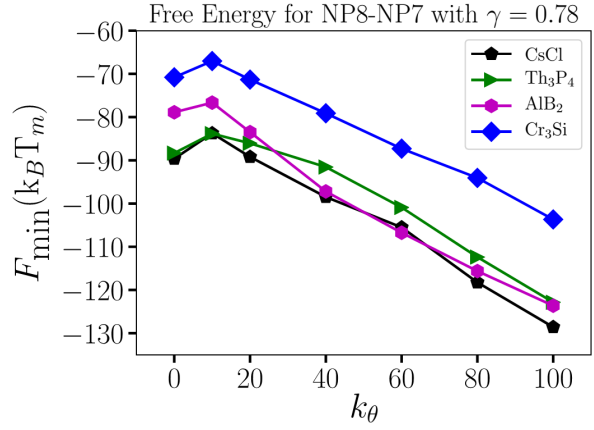

(b)

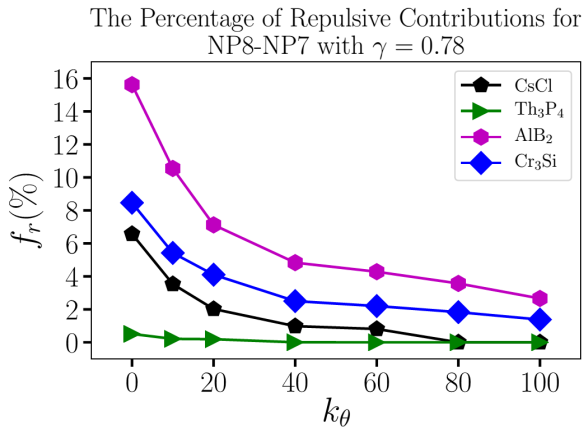

(c)

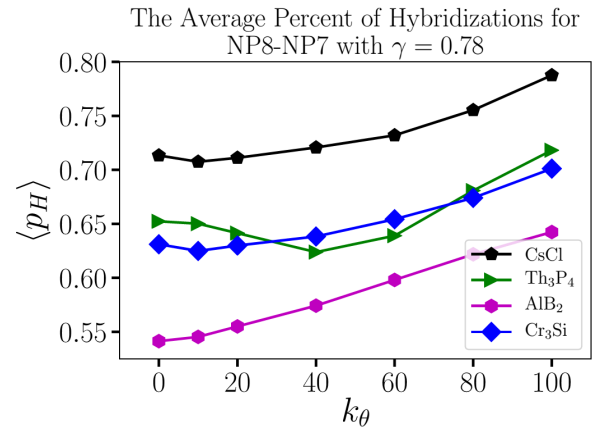

(d)

Figure S14: The effect of the spring parameter  $k_\theta$  of the harmonic angle potential on (a) potential of mean force (NP9-NP9), (b) free energies, (c) the repulsive fraction  $f_r$  (see Eq. 17) and (d) the average percent of hybridizations  $\langle p_H \rangle$  for CsCl, Th<sub>3</sub>P<sub>4</sub>, AlB<sub>2</sub> and Cr<sub>3</sub>Si with  $\gamma = 0.78$  (NP8 - NP7), see Table 2 for detailed values. All values are for  $\frac{\epsilon_{AB}}{k_B T_m} = 13.0$ .

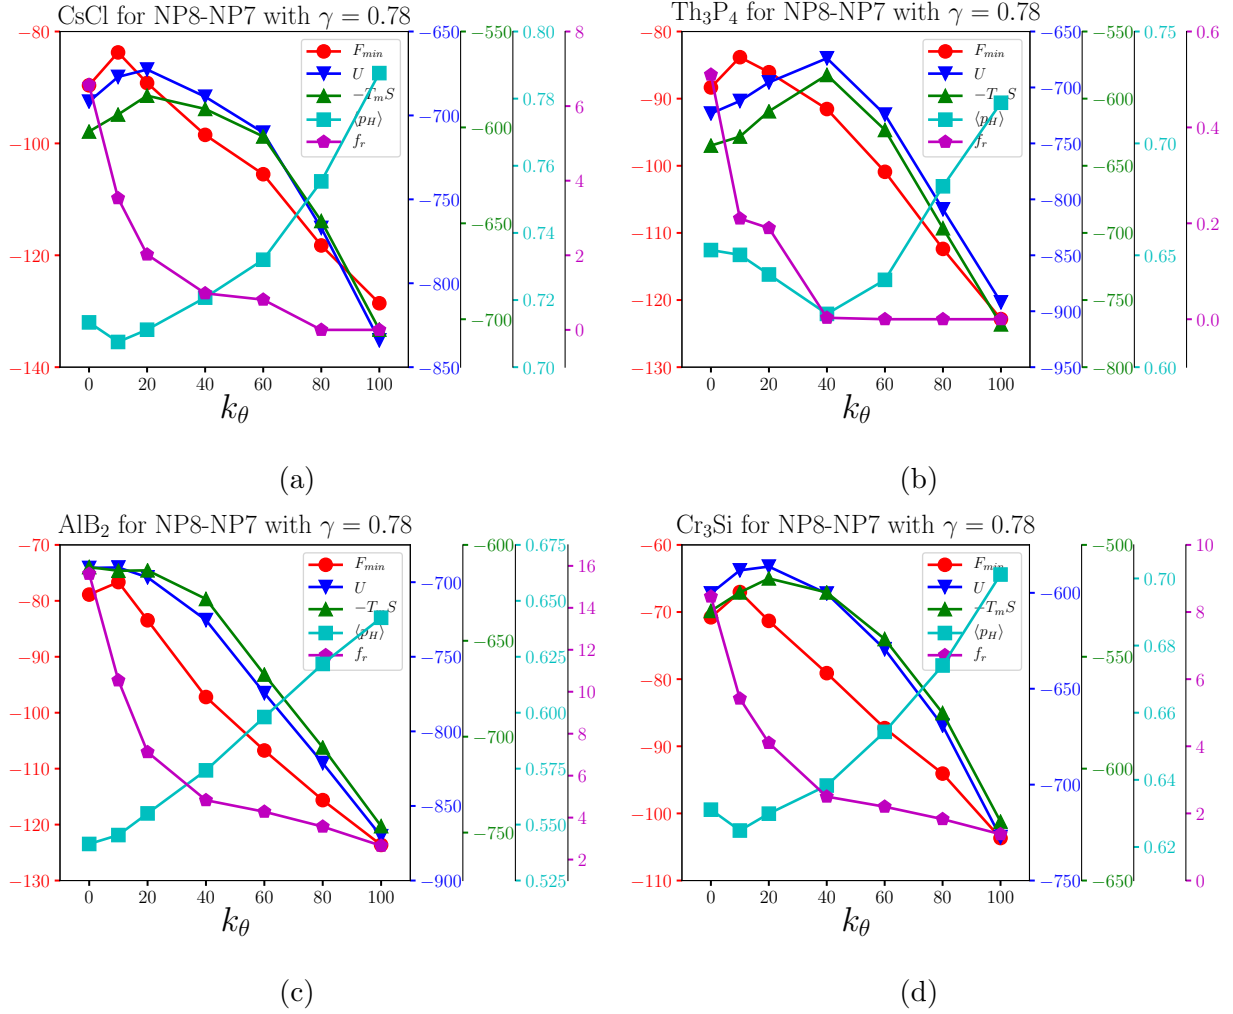

Figure S15: Free energies, internal energies, entropy, the average percent of hybridizations  $\langle p_H \rangle$  and the repulsive fraction  $f_r$  vs the spring parameter  $k_\theta$  of the harmonic angle potential for (a) CsCl, (b) Th<sub>3</sub>P<sub>4</sub>, (c) AlB<sub>2</sub> and (d) Cr<sub>3</sub>Si with  $\gamma = 0.78$  (NP8 - NP7), see Table 2 for detailed values. All values are for  $\frac{\epsilon_{AB}}{k_B T_m} = 13.0$ . The units for the free energies, internal energies and  $-T_m S$  are all  $k_B T_m$ .

## Comparison to Experiment

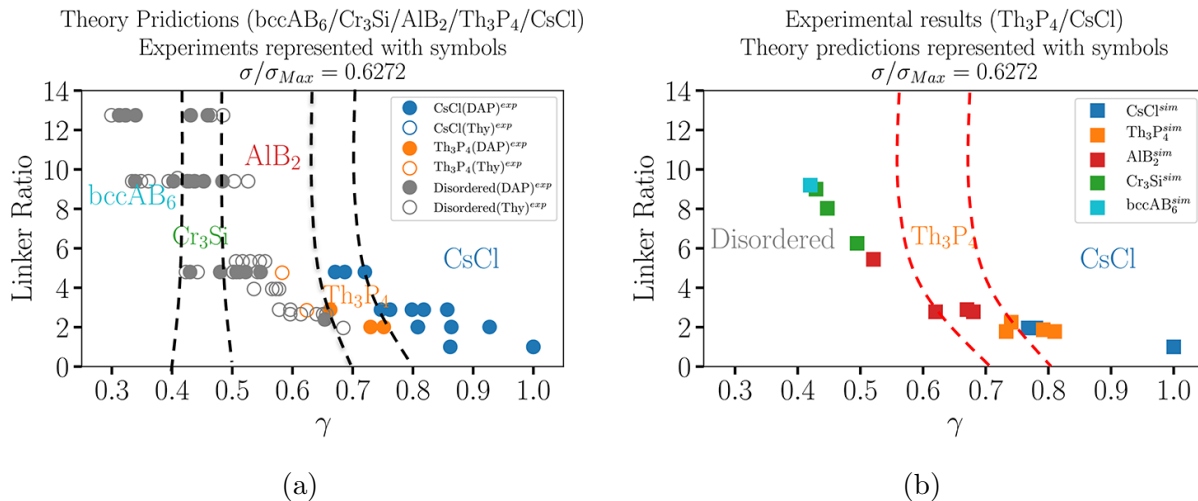

Figure S16: (a) The theoretical and (b) experimental phase diagrams as a function of the hard sphere radius ratio with  $\sigma_g/\sigma_{g,Max} = 0.6272$  and the PS coverage ratios (large to small NCT), where the black dashed lines are phase boundaries. The circle symbols are the experimental results and the squares indicate our simulated values. DAP and Thy in brackets indicate that the NCTs with DAP or Thy are A particles.

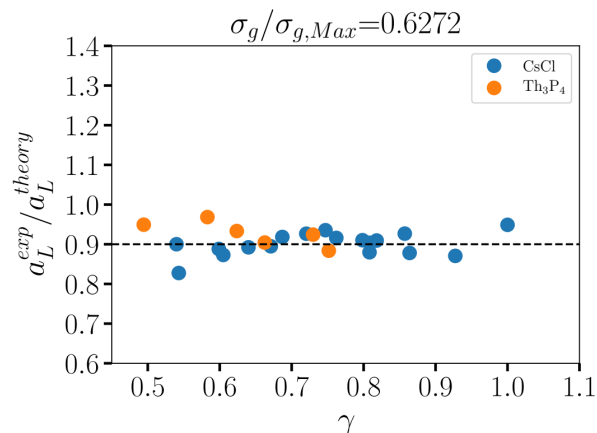

Figure S17: The comparison of the measured lattice constant and the predicted values of the OPM formula by assuming  $\sigma_g/\sigma_{g,Max} = 0.6272$ .

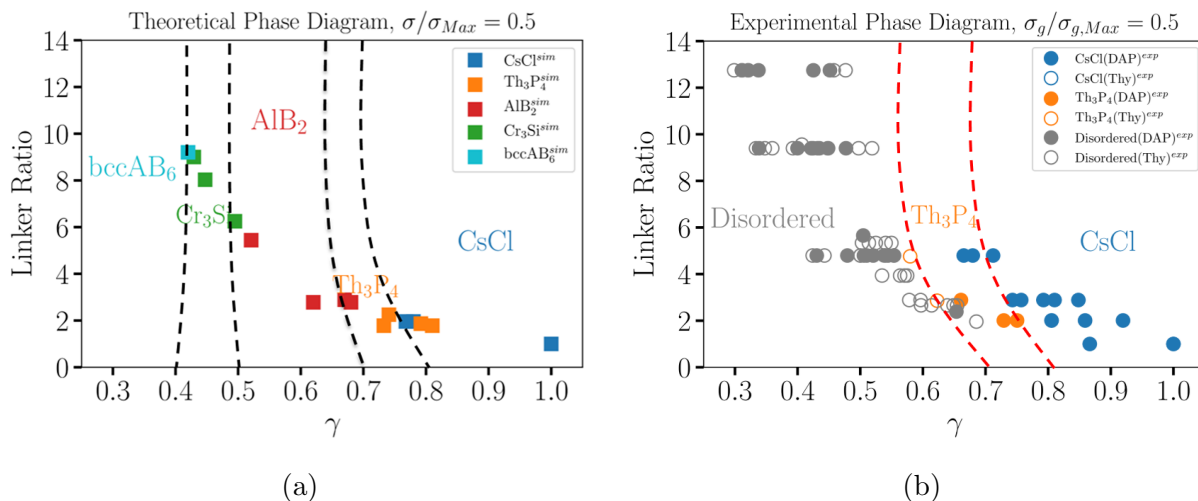

Figure S18: (a) The theoretical and (b) experimental phase diagrams as a function of the hard sphere radius ratio with  $\sigma_g/\sigma_{g,Max} = 0.5$  and the PS coverage ratios (large to small NCT), which are determined by the corresponding simulated and experimental data points. DAP and Thy in brackets indicate that the NCTs with DAP or Thy are A particles.

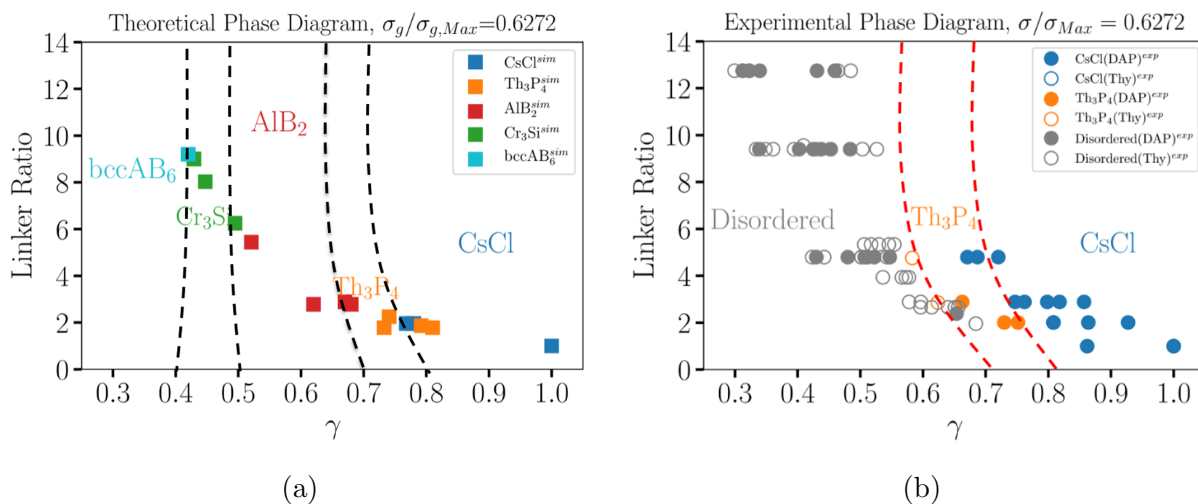

Figure S19: (a) The theoretical and (b) experimental phase diagrams as a function of the hard sphere radius ratio with  $\sigma_g/\sigma_{g,Max} = 0.6272$  and the PS coverage ratios (large to small NCT), which are determined by the corresponding simulated and experimental data points. DAP and Thy in brackets indicate that the NCTs with DAP or Thy are A particles.

## Experimental Section

Table S14: Molecular weight (MW) and dispersities of the polymers used in our experiments.

| Polymer Name | MW(kDa) | Dispersity |
|--------------|---------|------------|
| 6k DAP       | 6.4     | 1.08       |
| 6k Thy       | 6.5     | 1.09       |
| 9k DAP       | 8.7     | 1.17       |
| 9k Thy       | 9.5     | 1.10       |
| 11k DAP      | 11.3    | 1.04       |
| 11k Thy      | 11.4    | 1.04       |
| 14k DAP      | 14.3    | 1.27       |
| 14k Thy      | 14.0    | 1.06       |
| 16k DAP      | 16.1    | 1.35       |
| 16k Thy      | 15.9    | 1.03       |
| 18k DAP      | 17.8    | 1.09       |
| 18k Thy      | 18.5    | 1.17       |

Table S15: Size and dispersities of the gold nanoparticles used in our experiments.

| Diameter (nm) | Relative Standard Deviation (%) | Centrifuge Protocol   |
|---------------|---------------------------------|-----------------------|
| 12.1          | 8.8                             | 9,000 RPM, 50 minutes |
| 15.6          | 8.1                             | 7,000 RPM, 50 minutes |
| 18.7          | 9.8                             | 7,000 RPM, 40 minutes |
| 26.5          | 11.1                            | 7,000 RPM, 30 minutes |
| 37.1          | 10.6                            | 2,500 RPM, 25 minutes |

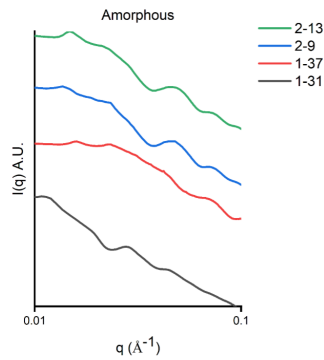

Figure S20: SAXS curves for some typical samples with amorphous structure.

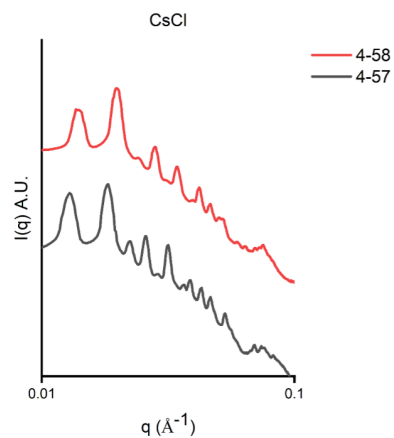

Figure S21: SAXS curves for some typical samples with the CsCl BNSL.

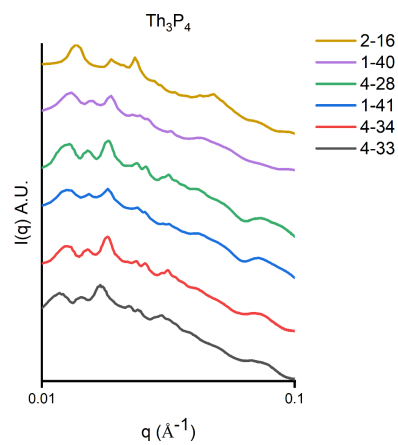

Figure S22: SAXS curves for some typical samples with the Th<sub>3</sub>P<sub>4</sub> BNSL.

## Effect of solvent quality

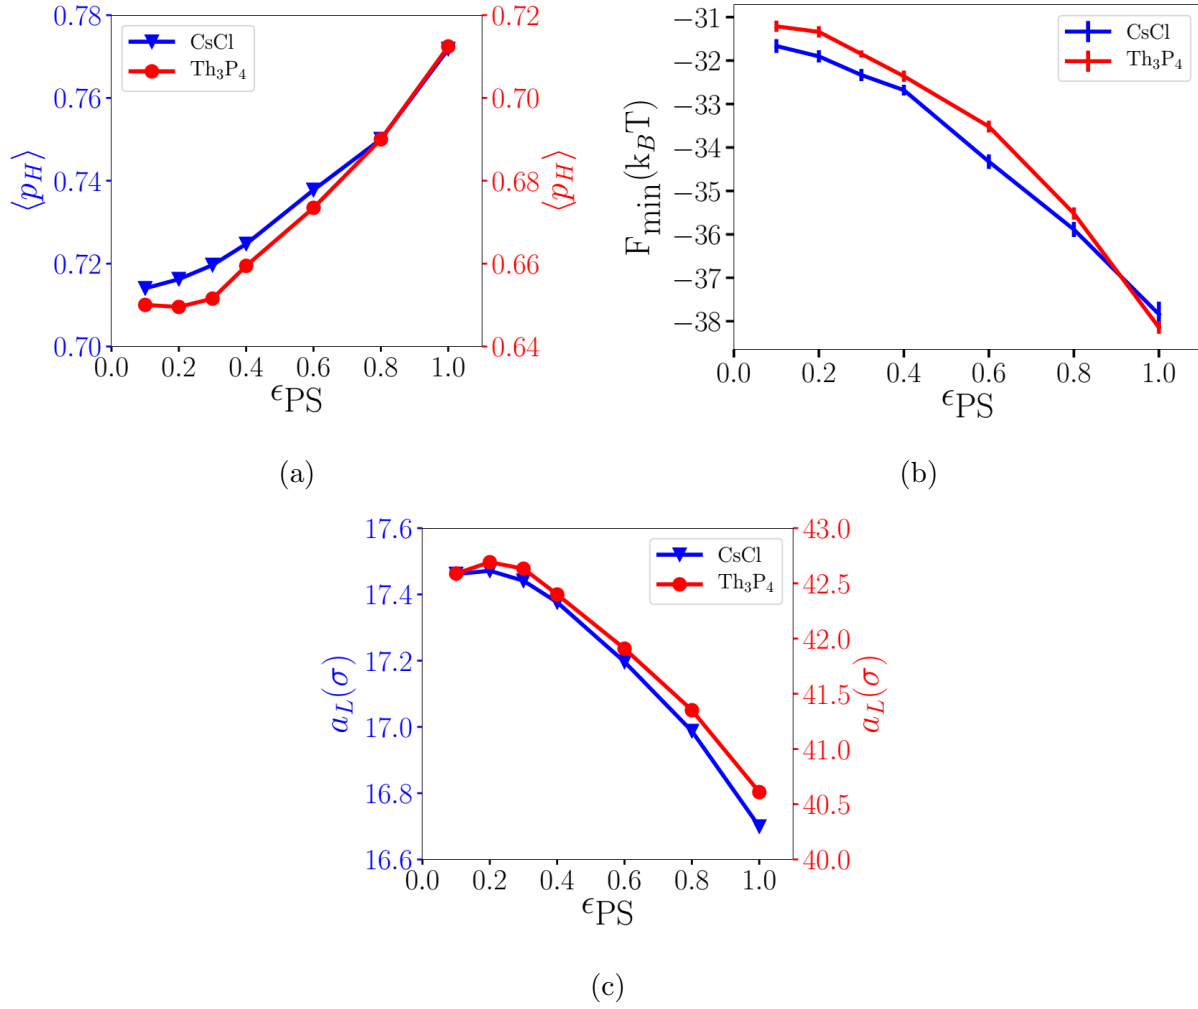

Figure S23: (a) The average percent of hybridizations as a function of  $\epsilon_{PS}$  for the CsCl and  $Th_3P_4$  lattices with NP1 and NP2; (b) The minimum of the free energy  $F_{min}$  and (d) the corresponding lattice constant  $a_L$  varies with  $\epsilon_{PS}$  for the CsCl and  $Th_3P_4$  lattices.



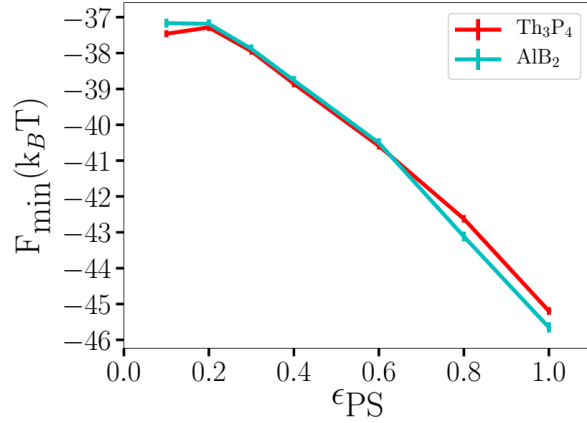

(a)

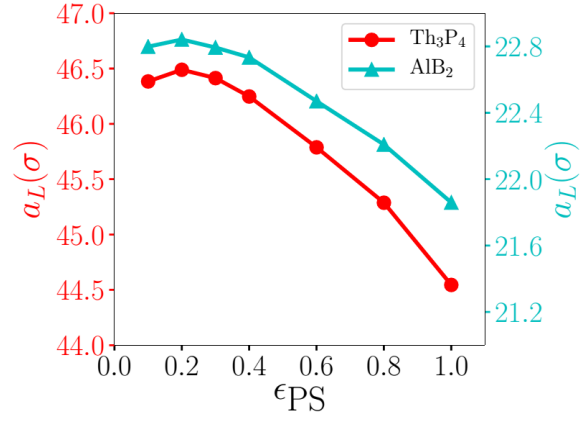

(b)

Figure S24: (a) The average percent of hybridizations as a function of  $\epsilon_{PS}$  for the CsCl and Th<sub>3</sub>P<sub>4</sub> lattices with NP1 and 25.5nm(8k) where  $\gamma = 0.67$ ; (b) The minimum of the free energy  $F_{min}$  and (d) the corresponding lattice constant  $a_L$  varies with  $\epsilon_{PS}$  for the CsCl and Th<sub>3</sub>P<sub>4</sub> lattices with 15nm(8k) and 25.5nm(8k) where  $\gamma = 0.67$ .

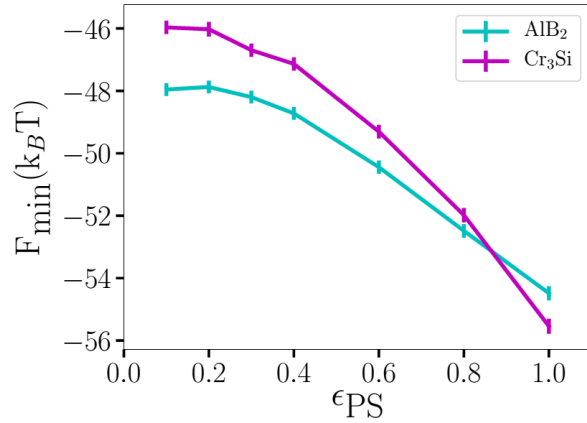

(a)

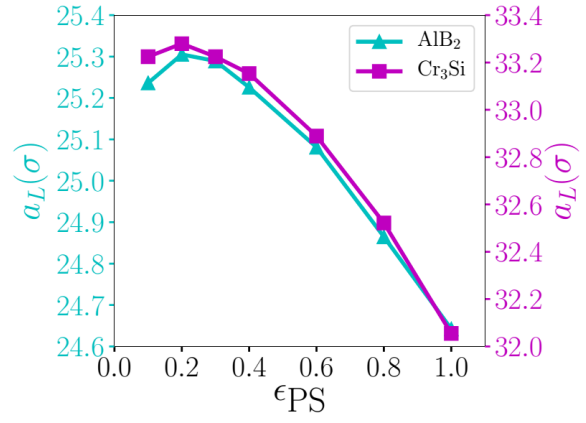

(b)

Figure S25: (a) The minimum of the free energy  $F_{min}$  and (b) the corresponding lattice constant  $a_L$  varies with  $\epsilon_{PS}$  for AlB<sub>2</sub> and Cr<sub>3</sub>Si lattices with 15nm(8k) and 37.5nm(8k) where  $\gamma = 0.49$ .

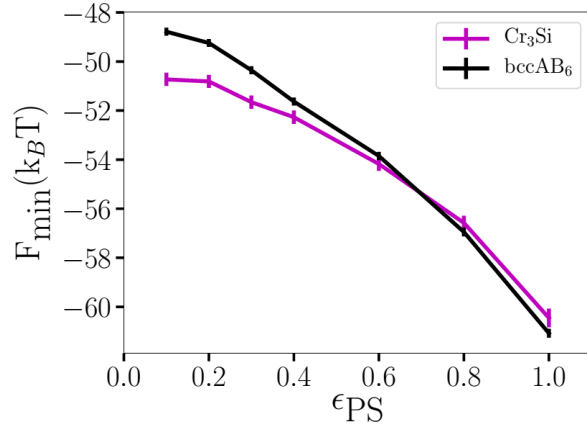

(a)

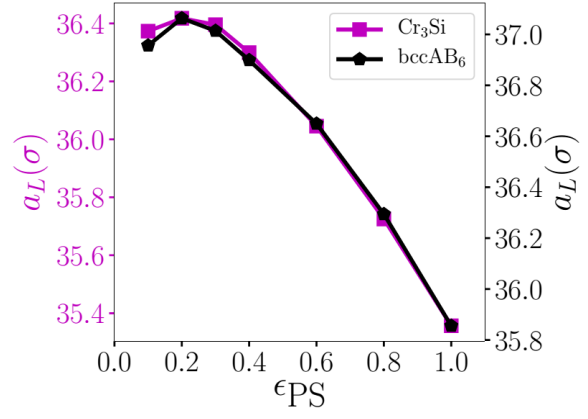

(b)

Figure S26: (a) The minimum of the free energy  $F_{min}$  and (b) the corresponding lattice constant  $a_L$  varies with  $\epsilon_{PS}$  for  $Cr_3Si$  and  $bccAB_6$  lattices with 15nm(8k) and 46nm(8k) where  $\gamma = 0.42$ .
